# Supplementary material for: How to Maximally Support Local and Regional Biodiversity in Applied Conservation? Insights from Pond Management
Source: PLoS One. 2013 Aug 12;8(8):e72538. doi: 10.1371/journal.pone.0072538 (PMC3741229; doi:10.1371/journal.pone.0072538)
Supplement: Table S6 — List of taxa uniquely found to be present in each of the management types during the course of the study. (XLSX) [file pone.0072538.s009.xlsx]

## Sheet: Sheet1
Table S6.
	NF	YF	NM	LI	CF
Zooplankton (Cladocera)
	A. exigua (Lilljeborg)	D. magna (Straus)	A. quadrangularis (O. F. Müller)	D. obtusa (Kurz)	D. ambigua (Scourfield)a
	C. dubia (Richard)	D. pulex (Leydig)	C. rectirostris (Schödler)
	C. megops (Sars)		D. cucullata (Sars)
	S. serrulatus (Koch)		L. kindtii (Focke)
	P. pediculus (L.)		P. unicatus (Baird)
	M. rosea (Jurine)		S. expinosus (Koch)
	K. latissima (Kurz)a
Macro-invertebrates
	A. vortex (L.)	L. glabra (Müller)	H. complanatus (L.)	P. carinatus (Müller)	Micronecta sp.
	A. leucostomus (Millet)	Ephydridae	V. contectus (Müller)	Cyclindrotomidae
	S. nitida (Müller)	Psychodidae	R. linearis (Linné)
	C. bonsdorffi (Sahlb.)	Ptychopteridae
	H. linnei (Fieb.)
	Sciomizydae
Submerged and floating plants
	A. nodiflorum (L.)	P. berchtoldii (Fieb.)	C. stagnalis (Scop.)	C. platycarpa (Kütz.)	H. morsus-ranae (L.)
	C. braunii (Gmelin)	Z. palustris (L.)	N. alba (L.)		M. verticillatum (L.)
	R. peltatus (Schrank)	P. friessi (Rupr.)	U. ochroleuca (Hartm.)
	L. natans (L.)	C. palustris (L.)
	Callitriche sp.	A. filiculoides (Lam.)a
Emergent vegetation
	E. multicaulis (Smith)	A. plantago-aquatica (L.)	B. tripartita (L.)	E. parviflorum (Schreb.)	Typha x glauca
	G. palustre (L.)	F. arundinacae (Schreb.)	C. canescens (Weber)
	G. maxima (Hartm.)	Glyceria sp.	C. disticha (Huds.)
	J. articulatus (L.)	P. mitis (Schrank)	C. rostrata (Stokes)
	R. flammula (L.)	P. maculosa (S.F. Gray)	G. ulginosum (L.)
	S. erectum (L.)	P. palustre (L.)	J. bufonius (L.)
	B. ranunculoides (L.)	R. maritimus (L.)	L. pendunculatus (Cav.)
	B. repens (Lam.)	R. repens (L.)	M. caerulea (L.)
	L. uniflora (L.)	C. fuscus (L.)	P. arundinacea (L.)
	P. globulifera (L.)	S. inaequidens (DC.)a
a not native to Belgium
